# Supplementary material for: Deep Eutectic Solvent Based Reversed-Phase Dispersive Liquid–Liquid Microextraction and High-Performance Liquid Chromatography for the Determination of Free Tryptophan in Cold-Pressed Oils
Source: MDPI journal article supplement (doi:10.3390/molecules28052395), 2023-03-05
Supplement: s1 [file s1]

## SUPPLEMENTARY MATERIALS

**Supplementary Table S1.** Analytical eco-scale of the DES-RP-DLLME-HPLC method for tryptophan in oils

|                                          |                                          |  |    |
|------------------------------------------|------------------------------------------|--|----|
| Reagents                                 |                                          |  |    |
| Amount                                   | n-hexane <10 mL (g)                      |  | 8  |
|                                          | DES amount <10 mL (g)                    |  | 1  |
| Hazard (physical, environmental, health) | none                                     |  | 0  |
| Instruments                              |                                          |  |    |
| Energy                                   | HPLC instrument < 1.5 kWh per sample     |  | 1  |
|                                          | Vortex, Ultrasonic bath, Centrifuge, and |  | 1  |
|                                          | Water bath < 1.5 kWh per sample          |  |    |
| Occupational hazard                      | Analytical process                       |  | 0  |
| Waste                                    | 1–10 mL (g)                              |  | 3  |
| Total penalty points                     |                                          |  | 14 |
| Eco-scale score                          |                                          |  | 86 |

**Supplementary Table S2.** GAPI of the DES-RP-DLLME-HPLC method for tryptophan in oils

|                              |                               |
|------------------------------|-------------------------------|
| 1. Collection:               | off-line ▼                    |
| 2. Preservation:             | None ▼                        |
| 3. Transport:                | None ▼                        |
| 4. Storage:                  | Under normal conditio ▼       |
| 5. Type of method:           | Simple procedures ▼           |
| 6. Scale of extraction:      | Micro-extraction ▼            |
| 7. Solvents/reagents used:   | Green solvents/reagent ▼      |
| 8. Additional treatments:    | Simple treatments ▼           |
| <b>Reagents and solvents</b> |                               |
| 9. Amount:                   | < 10 mL (< 10 g) ▼            |
| 10. Health hazard:           | Slightly toxic, slight irri ▼ |
| 11. Safety hazard:           | Highest NFPA flammal ▼        |
| <b>instrumentation</b>       |                               |
| 12. Energy:                  | <= 1.5 kWh per sample ▼       |
| 13. Occupational hazard:     | Hermetic sealing of the ▼     |
| 14. Waste:                   | 1-10 mL (1-10 g) ▼            |
| 15. Waste treatment:         | No treatment ▼                |
| <b>Method type</b>           |                               |
| Type of analysis:            | Qualitative and quantit ▼     |

**Supplementary Table S3.** The content of tryptophan in nut vegetables from the following stores: A. JEZGRO (address: Ruzveltova 24, Belgrade); B. BIO ŠPAJZ (address: Bulevar Kralja Aleksandra 297, Belgrade); C. ZDRAVAC (address: Čumićevo sokače, Lokal 45, Belgrade); D. BIO MARKET (address: Svetogorska 18, Belgrade); E. DREN (address: Bulevar Despota Stefana 90, Belgrade); F. BIO SHOP (address: Braće Jerković 116, Belgrade); G. (address: EFEDRA, Prvomajska 8k, Zemun).

#### 1. Almond

| Samples | Replicates |      |      | Store | Mean <sub>i</sub> | SD <sub>i</sub> |
|---------|------------|------|------|-------|-------------------|-----------------|
|         | 1          | 2    | 3    |       |                   |                 |
| 1       | 15.8       | 16.9 | 14.9 | A     | 15.9              | 1.04            |
| 2       | 16.7       | 16.6 | 17.1 | B     | 16.8              | 0.30            |
| 3       | 14.5       | 16.7 | 15.2 | C     | 15.5              | 1.08            |
| 4       | 14.9       | 14.8 | 16.3 | E     | 15.3              | 0.85            |
| 5       | 15.8       | 15.1 | 17.1 | F     | 16.0              | 0.98            |
|         |            |      |      |       | Mean              | %MAXrange       |
|         |            |      |      |       | 15.9              | 16.4            |

#### 2. Brazilian nut

| Samples | Replicates |      |      | Store | Mean <sub>i</sub> | SD <sub>i</sub> |
|---------|------------|------|------|-------|-------------------|-----------------|
|         | 1          | 2    | 3    |       |                   |                 |
| 1       | 14.3       | 12.8 | 14.5 | A     | 13.8              | 0.92            |
| 2       | 15.3       | 14.2 | 13.5 | C     | 14.3              | 0.90            |
| 3       | 14.3       | 14.9 | 13.9 | D     | 14.4              | 0.50            |
| 4       | 12.9       | 14.8 | 13.5 | E     | 13.7              | 0.99            |
| 5       | 15.0       | 13.8 | 13.5 | G     | 14.1              | 0.78            |
|         |            |      |      |       | Mean              | %MAXrange       |
|         |            |      |      |       | 14.1              | 18.1            |

#### 3. Cashew

| Samples | Replicates |      |      | Store | Mean <sub>i</sub> | SD <sub>i</sub> |
|---------|------------|------|------|-------|-------------------|-----------------|
|         | 1          | 2    | 3    |       |                   |                 |
| 1       | 10.6       | 11.3 | 11.5 | B     | 11.2              | 0.48            |
| 2       | 10.1       | 10.2 | 10.9 | D     | 10.4              | 0.42            |
| 3       | 10.8       | 10.1 | 11.8 | E     | 10.9              | 0.82            |
| 4       | 10.1       | 11.5 | 10.4 | F     | 10.6              | 0.72            |
| 5       | 11.3       | 10.6 | 11.4 | G     | 11.1              | 0.42            |
|         |            |      |      |       | Mean              | %MAXrange       |
|         |            |      |      |       | 10.8              | 15.3            |

#### 4. Hazelnut

| Samples | Replicates |      |      | Store | Mean <sub>i</sub> | SD <sub>i</sub> |
|---------|------------|------|------|-------|-------------------|-----------------|
|         | 1          | 2    | 3    |       |                   |                 |
| 1       | 16.3       | 17.0 | 16.6 | A     | 16.6              | 0.35            |
| 2       | 17.6       | 18.4 | 17.2 | B     | 17.7              | 0.63            |
| 3       | 18.2       | 16.0 | 16.7 | C     | 17.0              | 1.13            |
| 4       | 18.4       | 17.6 | 16.5 | F     | 17.5              | 0.97            |
| 5       | 18.1       | 17.9 | 17.4 | G     | 17.8              | 0.35            |
|         |            |      |      |       | Mean              | %MAXrange       |
|         |            |      |      |       | 17.3              | 13.9            |

#### 5. Peanuts

| Samples | Replicates |      |      | Store | Mean <sub>i</sub> | SD <sub>i</sub> |
|---------|------------|------|------|-------|-------------------|-----------------|
|         | 1          | 2    | 3    |       |                   |                 |
| 1       | 17.5       | 19.0 | 18.8 | B     | 18.4              | 0.84            |

|   |      |      |      |   |      |           |
|---|------|------|------|---|------|-----------|
| 2 | 17.4 | 17.8 | 18.6 | C | 18.0 | 0.62      |
| 3 | 17.7 | 16.7 | 16.8 | E | 17.1 | 0.56      |
| 4 | 17.3 | 16.8 | 16.9 | F | 17.0 | 0.26      |
| 5 | 17.8 | 19.1 | 16.8 | G | 17.9 | 1.12      |
|   |      |      |      |   | Mean | %MAXrange |
|   |      |      |      |   | 17.7 | 13.1      |

#### 6. Pumpkin seeds

| Samples | Replicates |      |      | Store | Mean <sub>i</sub> | SD <sub>i</sub> |
|---------|------------|------|------|-------|-------------------|-----------------|
|         | 1          | 2    | 3    |       |                   |                 |
| 1       | 35.0       | 29.3 | 34.4 | A     | 32.9              | 3.13            |
| 2       | 30.7       | 28.1 | 36.4 | B     | 31.7              | 4.22            |
| 3       | 33.3       | 28.5 | 30.7 | D     | 30.8              | 2.40            |
| 4       | 35.7       | 32.5 | 28.4 | E     | 32.2              | 3.64            |
| 5       | 29.2       | 32.3 | 35.3 | F     | 32.3              | 3.06            |
|         |            |      |      |       | Mean              | %MAXrange       |
|         |            |      |      |       | 32.0              | 25.8            |

#### 7. Sesame seeds

| Samples | Replicates |      |      | Store | Mean <sub>i</sub> | SD <sub>i</sub> |
|---------|------------|------|------|-------|-------------------|-----------------|
|         | 1          | 2    | 3    |       |                   |                 |
| 1       | 35.8       | 35.3 | 31.5 | B     | 34.2              | 2.33            |
| 2       | 30.7       | 31.8 | 36.8 | C     | 33.1              | 3.25            |
| 3       | 31.6       | 36.9 | 35.3 | D     | 34.6              | 2.72            |
| 4       | 31.9       | 29.2 | 28.1 | F     | 29.7              | 1.97            |
| 5       | 35.3       | 33.0 | 31.4 | G     | 33.2              | 1.99            |
|         |            |      |      |       | Mean              | %MAXrange       |
|         |            |      |      |       | 33.0              | 26.7            |

#### 8. Sunflower seeds

| Samples | Replicates |      |      | Store | Mean <sub>i</sub> | SD <sub>i</sub> |
|---------|------------|------|------|-------|-------------------|-----------------|
|         | 1          | 2    | 3    |       |                   |                 |
| 1       | 40.7       | 34.3 | 35.0 | A     | 36.7              | 3.51            |
| 2       | 35.4       | 40.7 | 37.3 | B     | 37.8              | 2.68            |
| 3       | 39.7       | 36.9 | 41.2 | C     | 39.3              | 2.17            |
| 4       | 34.9       | 37.1 | 36.3 | D     | 36.1              | 1.12            |
| 5       | 36.6       | 36.7 | 42.2 | G     | 38.5              | 3.19            |
|         |            |      |      |       | Mean              | %MAXrange       |
|         |            |      |      |       | 37.7              | 20.9            |

#### 9. Walnut

| Samples | Replicates |      |      | Store | Mean <sub>i</sub> | SD <sub>i</sub> |
|---------|------------|------|------|-------|-------------------|-----------------|
|         | 1          | 2    | 3    |       |                   |                 |
| 1       | 10.8       | 11.5 | 11.5 | A     | 11.3              | 0.40            |
| 2       | 12.5       | 11.8 | 12.0 | C     | 12.1              | 0.37            |
| 3       | 12.2       | 11.2 | 12.4 | E     | 11.9              | 0.68            |
| 4       | 12.4       | 12.3 | 12.2 | F     | 12.3              | 0.14            |
| 5       | 12.0       | 12.2 | 12.0 | G     | 12.0              | 0.13            |
|         |            |      |      |       | Mean              | %MAXrange       |
|         |            |      |      |       | 11.9              | 14.3            |

Mean<sub>i</sub> – The mean value for triplicates;

SD<sub>i</sub> – The standard deviation for triplicates;

%MAXrange – Range between the minimum and maximum individual results.
